# Supplementary material for: First characterization of cultivable extremophile Chroococcidiopsis isolates from a solar panel
Source: Front Microbiol. 2023 Feb 17;14:982422. doi: 10.3389/fmicb.2023.982422 (PMC9982165; doi:10.3389/fmicb.2023.982422)
Supplement: Supplementary file 5 [file Table_5.XLSX]

## Sheet: Table S5
	Table S5. One-way ANOVA with post-hoc analysis of doubling time calculations for Chroococcidiopsis sp. B11 in several growth conditions
	ANOVA: SINGLE FACTOR for NaCl															ANOVA: SINGLE FACTOR for Urea
	Summary															Summary
	Groups	Count	Sum	Average	Variance											Groups	Count	Sum	Average	Variance
	Normal	3	19.99	6.66	3.63											Normal	3	19.992	6.66401	3.62943
	0.1 M	3	8.46	2.82	0.36											Urea 8 mM	3	7.19674	2.39891	0.0226147
	0.25 M	3	17.32	5.77	1.88											Urea 16 mM	2	4.24194	2.12097	1.48596e-06
	Anova															Anova
	Source of Variation	SS	df	MS	F	P-value	F crit									Source of Variation	SS	df	MS	F	P-value	F crit
	Between Groups	24.31	2	12.15	6.21	0.03	5.14									Between Groups	36.0024	2	18.0012	12.3227	0.0116824	5.78614
	Within Groups	11.74	6	1.96												Within Groups	7.30408	5	1.46082
	Total	36.04	8													Total	43.3064	7
	H0:	Normal=0.1M=0.25M=0.5M (NaCl)														H0:	Normal=8mM=16mM (Urea)
	If F>Fcrit and p<0.05 we reject the null hypothesis, meaning at least one condition is different.															If F>Fcrit and p<0.05 we reject the null hypothesis, meaning at least one condition is different.
	The results obtained with one-way ANOVA show that F>Fcrit and p<0.05, suggesting that the one or more treatments are significantly different. The Tukey HSD test, Scheffé, Bonferroni and Holm multiple comparison tests follow. These post-hoc tests would likely identify which of the pairs of treatments are significantly different from each other.															The results obtained with one-way ANOVA show that F>Fcrit and p<0.05, suggesting that the one or more treatments are significantly different. The Tukey HSD test, Scheffé, Bonferroni and Holm multiple comparison tests follow. These post-hoc tests would likely identify which of the pairs of treatments are significantly different from each other.
	Tukey HSD Test															Tukey HSD Test
	Treatments pair	Tukey HSD Q statistic	Tukey HSD p-value	Tukey HSD inference												Treatments pair	Tukey HSD Q statistic	Tukey HSD p-value	Tukey HSD inference
	Normal vs 0.1M	4.7619	0.0346034	* p<0.05												Normal vs 8mM	6.1121	0.0171102	* p<0.05
	Normal vs 0.25M	1.1032	0.7172557	insignificant												Normal vs 16mM	5.8231	0.0207455	* p<0.05
	0.1M vs 0.25M	3.6587	0.0910189	insignificant												8mM vs 16mM	0.3563	0.8999947	insignificant
	Scheffé multiple comparison															Scheffé multiple comparison
	Treatments pair	Scheffé T-statistic	Scheffé p-value	Scheffé inference												Treatments pair	Scheffé T-statistic	Scheffé p-value	Scheffé inference
	Normal vs 0.1M	3.3671	0.0414461	* p<0.05												Normal vs 8mM	4.3219	0.0204887	* p<0.05
	Normal vs 0.25M	0.78	0.7484273	insignificant												Normal vs 16mM	4.1176	0.0247529	* p<0.05
	0.1M vs 0.25M	2.5871	0.1056223	insignificant												8mM vs 16mM	0.2519	0.9689617	insignificant
	Bonferroni and Holm multiple comparison															Bonferroni and Holm multiple comparison
	Treatments pair	Bonferroni and Holm T-statistic	Bonferroni p-value	Bonferroni inference	Holm p-value	Holm inference										Treatments pair	Bonferroni and Holm T-statistic	Bonferroni p-value	Bonferroni inference	Holm p-value	Holm inference
	Normal vs 0.1M	3.3671	0.0452870	* p<0.05	0.0452870	* p<0.05										Normal vs 8mM	4.3219	0.0226705	* p<0.05	0.0226705	* p<0.05
	Normal vs 0.25M	0.78	1.39503	insignificant	0.4650112	insignificant										Normal vs 16mM	4.1176	0.0275873	* p<0.05	0.0183916	* p<0.05
	0.1M vs 0.25M	2.5871	0.1241195	insignificant	0.0827463	insignificant										8mM vs 16mM	0.2519	2.43341	insignificant	0.8111360	insignificant
